# Supplementary material for: Unravelling the potential of a hybrid borocarbonitride biphenylene 2D network for thermoelectric applications: a first principles study
Source: Royal Society of Chemistry journal article supplement (doi:10.1039/d4nr02754j), 2024-12-23
Supplement: d4nr02754j1.pdf [file d4nr02754j1.pdf]

## Supporting Information

### Unravelling the Potential of Hybrid Borocarbonitride Biphenylene 2D Network for Thermoelectric Applications: A First Principles Study

Ajay Kumar<sup>a</sup> Parbati Senapati<sup>a</sup> and Prakash Parida<sup>a\*</sup>

<sup>a</sup>Department of Physics, Indian Institute of Technology Patna, Bihta, Bihar, India, 801106

\*Corresponding author: - pparida@iitp.ac.in

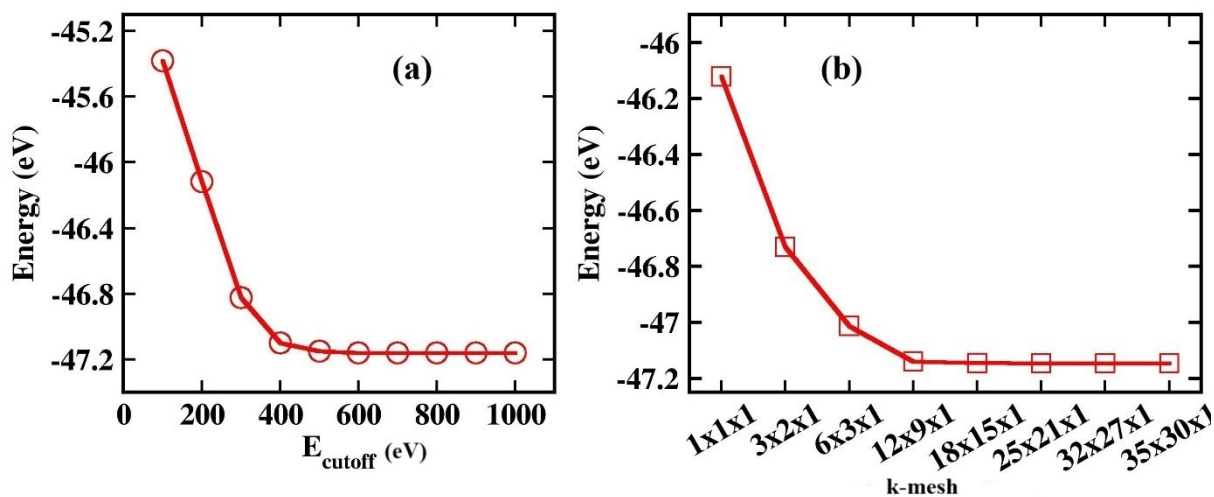

**Fig. S1:** Total energy versus plane wave energy cut off for plane wave and (b) the k-mesh plots for bpn-BCN monolayer.

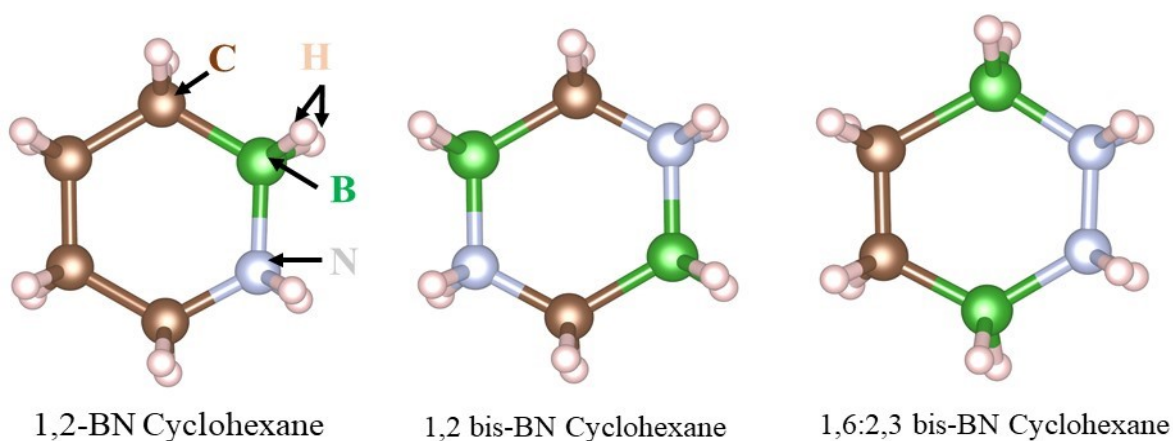

**Fig. S2:** Depicts the structures of precursors that can be use to synthesize the bpn-BCN monolayer.

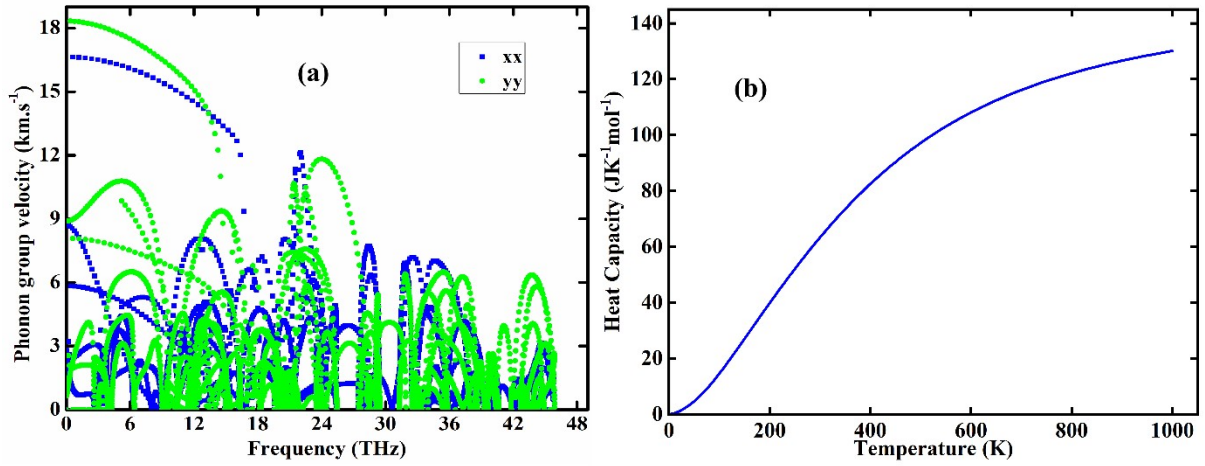

**Fig. S3:** (a) Anisotropic phonon group velocity versus frequency and (b) specific heat capacity at constant volume varies with temperature for bpn-BCN monolayer.

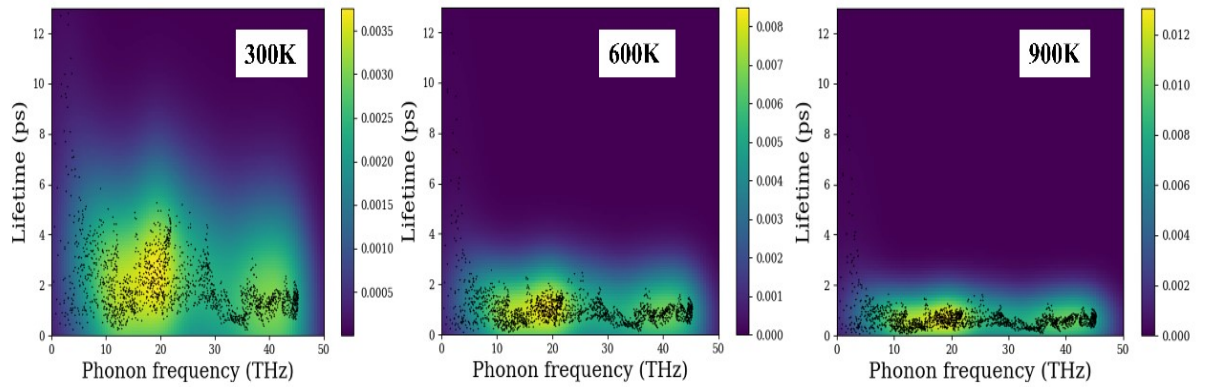

**Fig. S4:** Phonon lifetime versus phonon frequency at different temperatures (300K, 600K and 900K) in bpn-BCN monolayer.

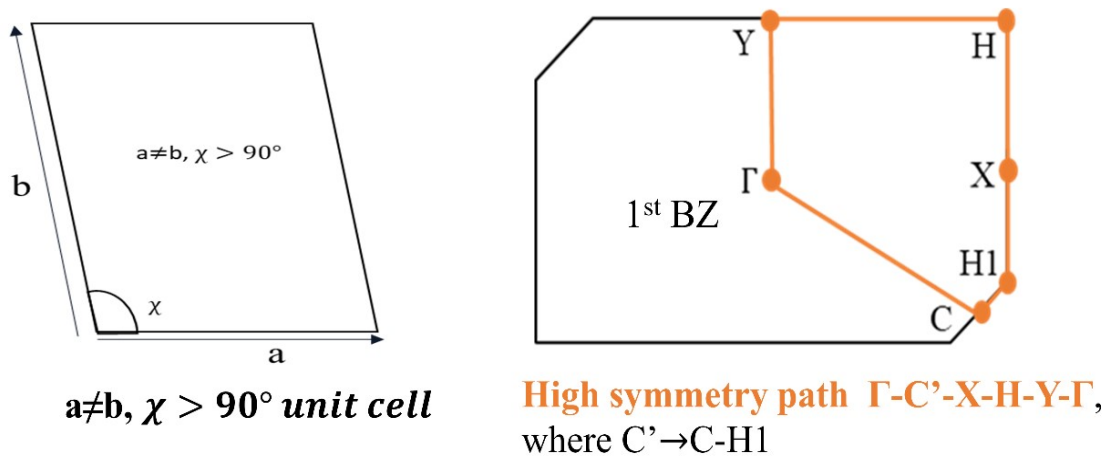

**Fig. S5:** Oblique unit cell and 1st Brillouin zone along with high symmetry point.

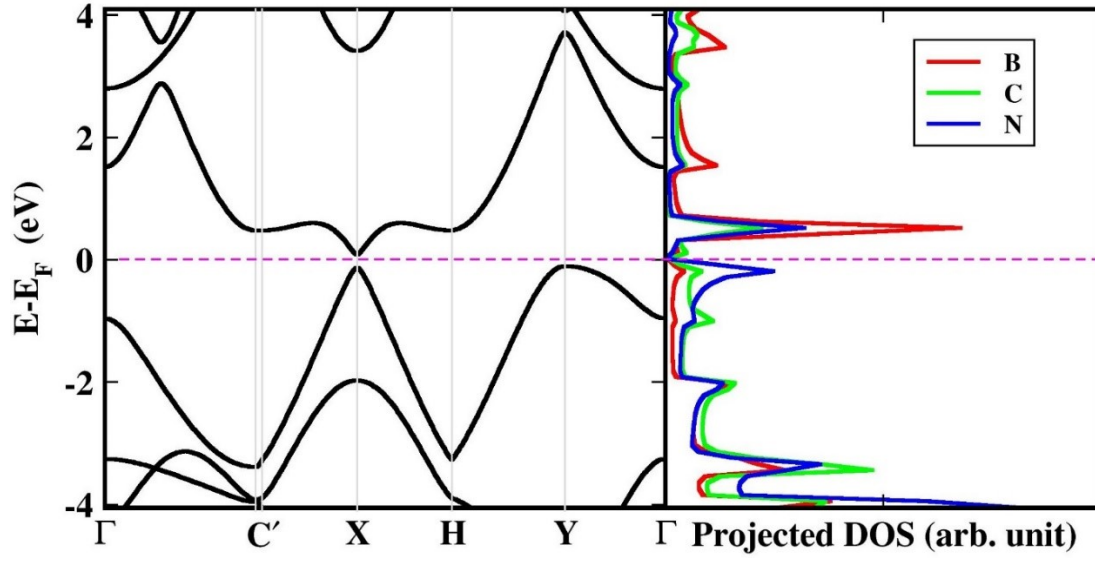

**Fig. S6:** Electronic band structure and projected density of states using GGA-PBE functional of bpn-BCN monolayer.

**Table S1:** The charge carrier, in-plane stiffness ( $C_{2D}$ ), deformation potential constant ( $E_P$ ) and carrier effective mass ( $m^*$ ) in bpn-BCN have been calculated at a temperature of  $T = 300$  K.

|            | Carrier | $v_g$<br>(m/s)     | $C^{2D}$<br>(N/m) | $E_P$<br>(eV) | $m^* (m_0)$ | $\mu^{2D}$<br>( $cm^2V^{-1}s^{-1}$ ) | $\tau$<br>(fs) |
|------------|---------|--------------------|-------------------|---------------|-------------|--------------------------------------|----------------|
| bpn-BCN(x) | $e$     | $4.1 \times 10^5$  | 238.7             | 7.12          | 0.092       | 661.41                               | 34.60          |
| bpn-BCN(y) | $e$     | $4.1 \times 10^5$  | 217.8             | 10.36         | 0.058       | 497.16                               | 16.39          |
| bpn-BCN(x) | $h$     | $4.86 \times 10^5$ | 238.7             | 11.95         | 0.064       | 601.93                               | 21.90          |
| bpn-BCN(y) | $h$     | $4.86 \times 10^5$ | 217.8             | 7.01          | 0.041       | 707.90                               | 16.50          |

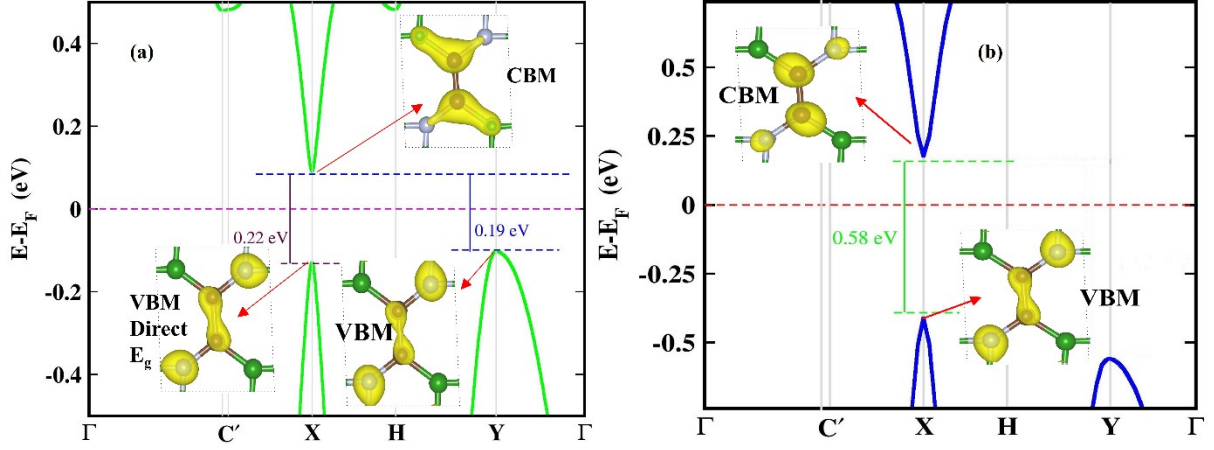

**Fig. S7:** VBM and CBM points along with wavefunction plots at iso-surface of  $e/\text{\AA}ng^3$  using (a) GGA-PBE and (b) HSE functional.

**Table S2:** Calculated  $L$  values at different temperature for a particular value of doping for both  $n$ -type and  $p$ -type ( $\mu - E_F = 0.1 \text{ eV}$ ).

| T (K) | n-type                                    |                                              |                                                      | p-type                                    |                                              |                                                      |
|-------|-------------------------------------------|----------------------------------------------|------------------------------------------------------|-------------------------------------------|----------------------------------------------|------------------------------------------------------|
|       | $\sigma \times 10^5$ ( $S\text{m}^{-1}$ ) | $\kappa_e$ ( $\text{Wm}^{-1}\text{K}^{-1}$ ) | $L \times 10^{-8}$ ( $\text{WS}^{-1}\text{K}^{-2}$ ) | $\sigma \times 10^5$ ( $S\text{m}^{-1}$ ) | $\kappa_e$ ( $\text{Wm}^{-1}\text{K}^{-1}$ ) | $L \times 10^{-8}$ ( $\text{WS}^{-1}\text{K}^{-2}$ ) |
| 250   | 1.392                                     | 0.84                                         | 2.413                                                | 2.470                                     | 1.520                                        | 2.453                                                |
| 500   | 2.864                                     | 3.23                                         | 2.255                                                | 2.554                                     | 3.129                                        | 2.450                                                |
| 750   | 3.901                                     | 6.56                                         | 2.242                                                | 2.748                                     | 5.048                                        | 2.449                                                |
| 1000  | 5.537                                     | 12.01                                        | 2.169                                                | 3.375                                     | 8.263                                        | 2.448                                                |

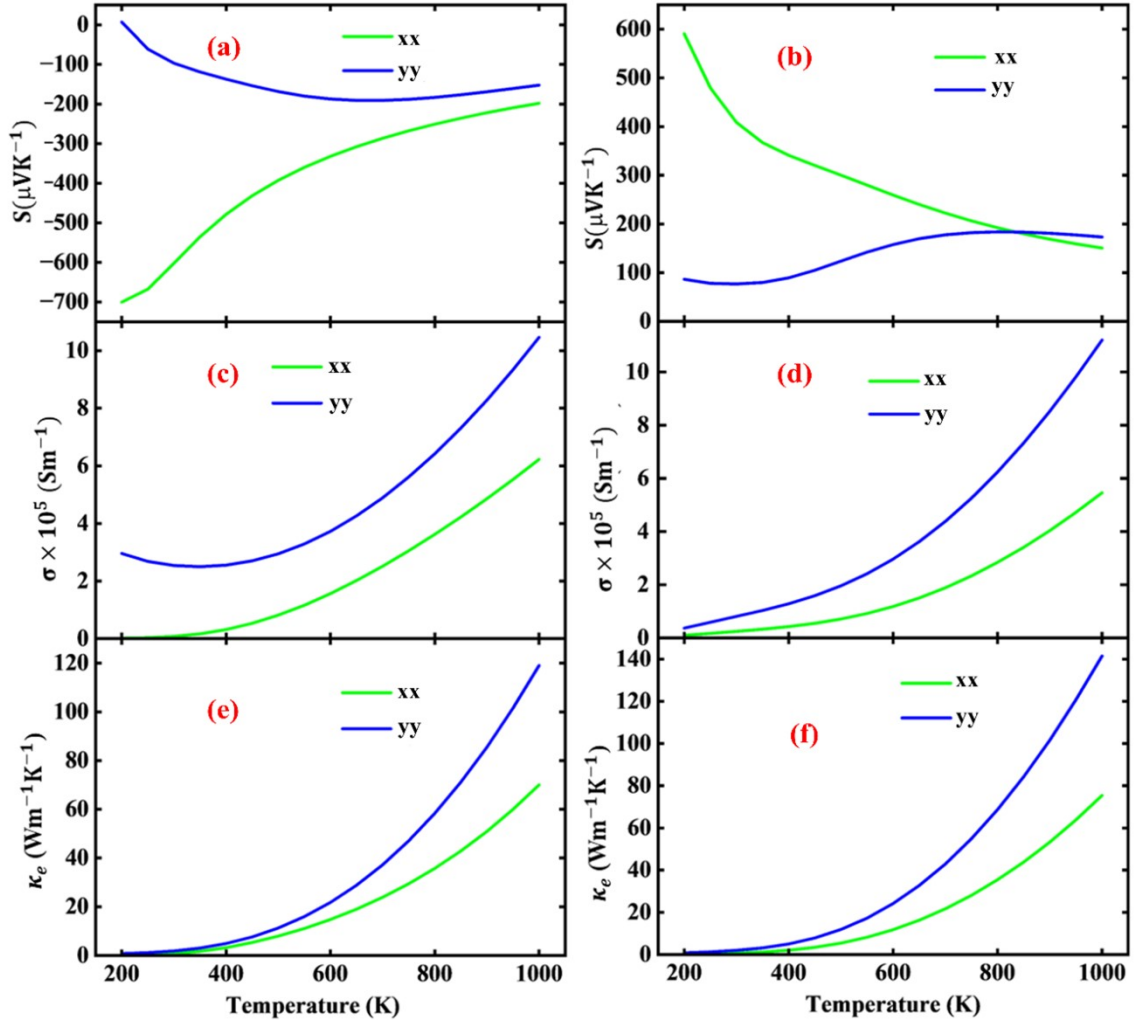

**Fig. S8:** Temperature-dependent variations of Seebeck coefficient (a, b), electrical conductivity (c, d), and electronic thermal conductivity (e, f) for (p-type, n-type) bpn-BCN monolayer.

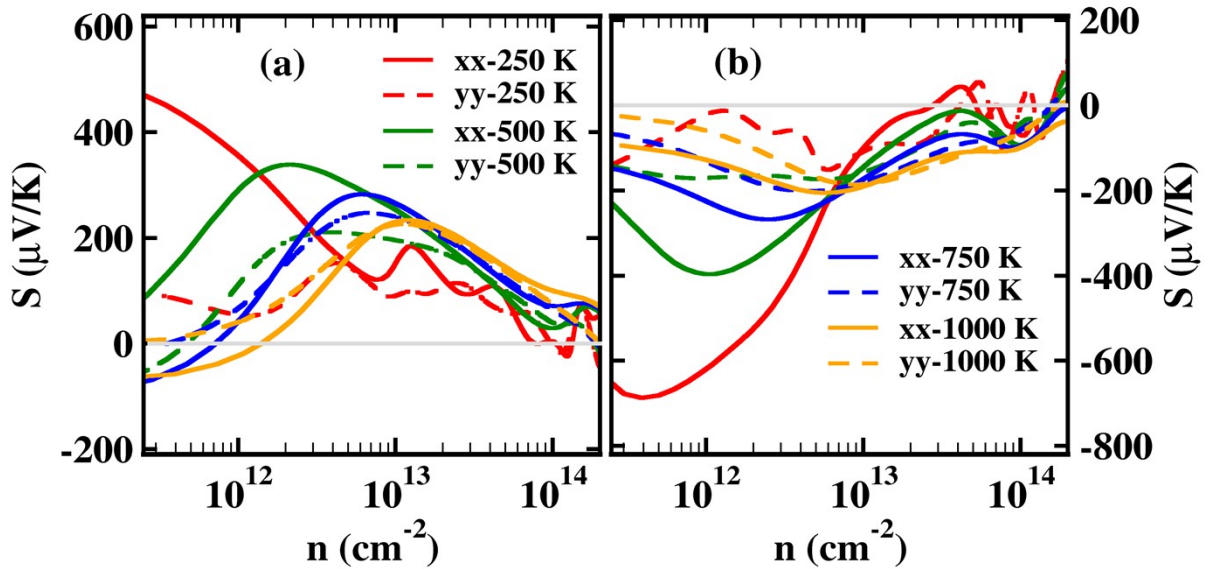

**Fig. S9:** Seebeck coefficients as a function of carrier concentration at different temperatures for (a) p-type doping and (b) n-type doping.

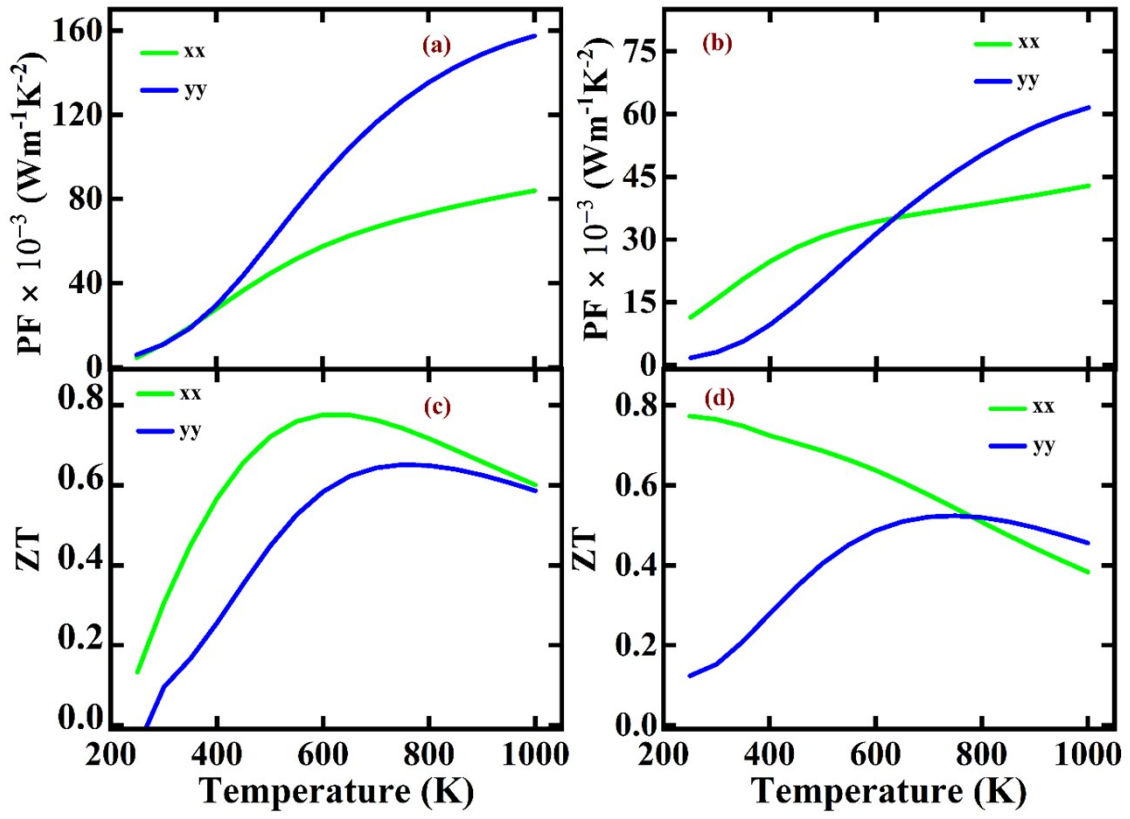

*Fig. S10: (a) and (b) power factor and (c) and (d) figure of merit for p-type and n-type bpn-BCN monolayer, respectively.*
